# Supplementary material
Source: Springer Nature journal article supplement (https://www.springermedizin.de/resource/supplementary/12913_2014_3390_MOESM5_ESM.pdf/9532652)
Supplement: MOESM5 [file 9532652]

# Congestive Cardiac Failure (p<0.001)\*

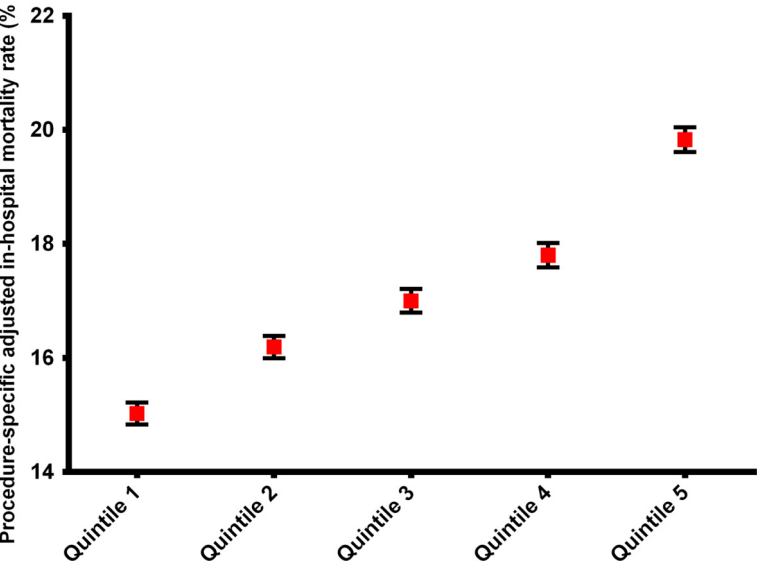

Quintile of "aggregate" in-hospital risk-adjusted mortality (1 = lowest, 5 = highest)
